# Supplementary material
Source: Springer Nature journal article supplement (https://www.springermedizin.de/resource/supplementary/13229_2012_37_MOESM2_ESM.pdf/9676066)

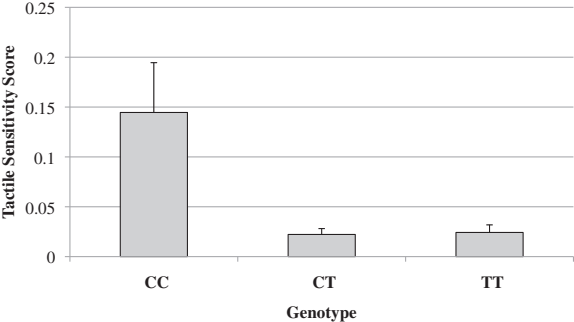

Supplement: MOESM2 [file 9676066]
